# Supplementary material for: Prediction of Mechanism and Thermochemical Properties of O3 + H2S Atmospheric Reaction
Source: Hindawi journal article supplement (doi:10.1155/2013/659682), 2012-12-30
Supplement: f1 [file 659682.f1.pdf]

Supporting information for:

## **Prediction of mechanism and thermochemical properties of $\text{O}_3 + \text{H}_2\text{S}$ atmospheric reaction**

Morteza Vahedpour<sup>1\*</sup>, Reza Baghary<sup>2</sup> and Freshteh Khalili

<sup>1</sup>Chemistry Department, University of Zanjan, P.O. Box 45195-313, Zanjan, Iran

<sup>2</sup>Chemistry Department, Payame Noor University, Abhar Branch, Abhar, Iran

\* To whom correspondence should be addressed. E-mail: [vahed@znu.ac.ir](mailto:vahed@znu.ac.ir) (Morteza Vahedpour)

In this supporting information, we present:

Geometries of some the intermediates and the transition state optimized by B3LYP/6-311++G(3df, 3pd)

C1

|   |             |             |             |
|---|-------------|-------------|-------------|
| S | 1.85920700  | -0.06212900 | -0.10497800 |
| H | 1.81200400  | 1.12848200  | 0.51182600  |
| H | 1.41450700  | -0.71214100 | 0.98109700  |
| O | -1.61995800 | 0.04974800  | -0.34883200 |
| O | -1.34911500 | -1.05782600 | 0.17894700  |
| O | -1.15265400 | 1.08029300  | 0.19322600  |

C2

|   |             |             |             |
|---|-------------|-------------|-------------|
| O | 0.96484500  | 1.28701400  | -0.22397900 |
| O | 0.49215900  | 0.31760000  | 0.40353700  |
| O | 1.07729200  | -1.22993900 | -0.16654100 |
| H | 1.78843300  | -1.30534100 | 0.48709600  |
| H | -1.64563900 | 1.10747600  | 0.13606500  |
| S | -1.27607300 | -0.17497100 | -0.04545600 |

C3

|   |             |             |             |
|---|-------------|-------------|-------------|
| O | -0.03305300 | 1.48117400  | -0.24767400 |
| O | -2.16364400 | -0.52928800 | 0.00547400  |
| O | 0.78194300  | 0.69046800  | 0.37564700  |
| S | 0.98661600  | -0.82670000 | -0.08078000 |
| H | -1.76470300 | 0.21306700  | -0.46620300 |
| H | -2.70311700 | -0.12468900 | 0.69110600  |

SOO

|   |             |             |            |
|---|-------------|-------------|------------|
| O | 1.26482200  | 0.89199100  | 0.00000000 |
| S | -0.63241100 | -0.79109400 | 0.00000000 |
| O | 0.00000000  | 0.69019600  | 0.00000000 |

TS1

|   |             |             |             |
|---|-------------|-------------|-------------|
| O | -2.12409400 | -0.61038800 | -0.19470900 |
| O | -1.13811200 | -0.15916100 | 0.39025100  |
| O | -0.71188300 | 1.08222400  | -0.11708500 |
| H | 0.33169100  | 0.88724500  | -0.03132400 |
| H | 2.51620600  | 0.25168800  | 0.94307700  |
| S | 1.80905100  | -0.22752100 | -0.09621300 |

## TS2

|   |             |             |             |
|---|-------------|-------------|-------------|
| O | 0.52408700  | 1.62903100  | -0.20930700 |
| O | 0.32160600  | 0.55496200  | 0.37916900  |
| O | 1.32162100  | -1.17167100 | -0.17427700 |
| H | 1.88808800  | -1.35785600 | 0.58830400  |
| H | -0.25444200 | -1.39474600 | -0.02343100 |
| S | -1.18576000 | -0.33412300 | -0.03309700 |

## TS3

|   |             |             |             |
|---|-------------|-------------|-------------|
| O | 1.21309700  | -0.98446300 | 0.18495800  |
| O | 1.36252700  | 0.24893200  | -0.32283300 |
| O | 0.51947200  | 1.05427400  | 0.21687700  |
| H | -1.64100100 | 0.15018400  | 1.17820500  |
| H | -0.18566400 | -0.93338900 | 0.12933800  |
| S | -1.43338100 | -0.11042100 | -0.12122200 |

## TS4

|   |             |             |             |
|---|-------------|-------------|-------------|
| O | 0.91301900  | 0.85020400  | 0.30450900  |
| O | 1.49784400  | -0.82107200 | -0.21463000 |
| O | -0.21727400 | 0.96739000  | -0.31488400 |
| S | -1.22922100 | -0.37370000 | 0.07269500  |
| H | 0.17169400  | -1.03692700 | 0.00567100  |
| H | 1.94712500  | -0.95604600 | 0.63124900  |

## TS5

|   |             |             |             |
|---|-------------|-------------|-------------|
| O | 2.16796800  | -0.61069300 | -0.25273000 |
| O | 1.49551500  | 0.15442300  | 0.45750200  |
| O | 0.42810300  | 0.79196500  | -0.27458900 |
| H | -0.27809700 | 0.93669500  | 0.42798800  |
| H | -1.36554100 | -1.29166900 | 0.38575500  |
| S | -1.94306600 | -0.14566200 | -0.01595000 |

## TS6

|   |             |             |            |
|---|-------------|-------------|------------|
| S | 0.00000000  | 0.82047500  | 0.00000000 |
| O | 0.85249600  | -0.36615700 | 0.00000000 |
| O | -0.85249600 | -1.27479200 | 0.00000000 |

## HSOOOH

|   |            |             |             |
|---|------------|-------------|-------------|
| O | 1.64423900 | -0.64484200 | 0.18313100  |
| O | 1.17508400 | 0.56090600  | -0.30943000 |

|   |             |             |             |
|---|-------------|-------------|-------------|
| O | -0.19111300 | 0.84453900  | 0.33126000  |
| H | -1.20282200 | -1.11500800 | 0.88852300  |
| H | 1.33295500  | -1.28499900 | -0.47746100 |
| S | -1.32223900 | -0.23030100 | -0.12817200 |

#### HOO

|   |             |             |            |
|---|-------------|-------------|------------|
| O | 0.05528700  | -0.60773400 | 0.00000000 |
| O | 0.05528700  | 0.71629500  | 0.00000000 |
| H | -0.88458600 | -0.86848500 | 0.00000000 |

#### HSO

|   |             |             |            |
|---|-------------|-------------|------------|
| O | 0.05321800  | 1.03672300  | 0.00000000 |
| H | -1.27724400 | -0.81230500 | 0.00000000 |
| S | 0.05321800  | -0.46759300 | 0.00000000 |

#### HSOH

|   |             |             |             |
|---|-------------|-------------|-------------|
| O | -1.08665400 | 0.02283100  | -0.11767200 |
| H | -1.45062000 | 0.02588800  | 0.77439500  |
| H | 0.87014200  | 1.22840300  | 0.01247200  |
| S | 0.57960700  | -0.08980900 | 0.00965700  |
